# Supplementary material
Source: HighWire-hosted journal article supplement (http://ard.bmj.com/highwire/filestream/203047/field_highwire_adjunct_files/1/Appendix_2.docx)
Supplement: Appendix_2.docx [file Appendix_2.docx]

**Appendix Table 2.** Review of the literature using PubMed search.

| Index terms | (SLE OR lupus OR anticardiolipin OR antiphospholipid OR APS) AND (renal OR proteinuria OR haematuria OR casts OR uremia OR nephrotic OR nephropathy OR nephrit* OR kidney OR glomerulonephrit* OR transplantation OR dialysis OR haemodialysis) |
| --- | --- |
| Limits | Terms included in Title/Abstract; English-language publications; human studies |
